# Supplementary material
Source: publisher figshare collection journal article supplement (https://springernature.figshare.com/ndownloader/files/28096494)
Supplement: Supplementary file 1 [file 28096494]

Measurement(s),earthworm communities • Abundance • organic material • Diversity • environmental properties
Technology Type(s),digital curation
Factor Type(s),location
Sample Characteristic - Organism,Lumbricina
Sample Characteristic - Environment,soil
Sample Characteristic - Location,global
